## INDICATIONS, CONTRAINDICATIONS, AND SOME SIDE EFFECTS OF HYPERBARIC OXYGEN THERAPY (HBOT) IN CHILDREN WITH SPECIAL NEEDS: A Cross-sectional Study

Khalid Mahmoud El Sayed Zayed

**Disclaimer:** The author has withdrawn their manuscript because, upon further review of the results, the pertinent patients' data were found to be erratic in some of the performed examinations and medical tests. In addition, some aspects of the data analysis tests were found to be in error and need to be revised and corrected. Therefore, the authors do not wish this work to be cited as a reference for the project. If you have any questions, please contact the corresponding author at [drzayed@outlook.com](mailto:drzayed@outlook.com).
